# Supplementary material
Source: publisher site journal article supplement (https://www.dovepress.com/article/253540)
Supplement: Supplementary file 1 [file get_supplementary_file.php]

## Supplementary Data

**Table S1: The primers and probes for detection of *Rickettsiaceae***

| Name                 | Sequence (5'-3')                            |
|----------------------|---------------------------------------------|
| Primer 47 F          | AACTGATTTTATTCAAACCTAATGCTGCT               |
| Primer 47 R          | TATGCCTGAGTAAGATACRTGAATRGAATT              |
| Probe 47             | 6FAM-TGGGTAGCTTTGGTGGACCGATGTTTAATCT-TAMRA  |
| Primer 17 F          | GGGCGGTATGAAYAAACAAG                        |
| Primer 17 R          | CCTACACCTACTCCVACAAG                        |
| Probe 17             | FAM-CCGAATTGAGAACCAAGTAATGC-TAMRA           |
| Primer <i>OmpB</i> F | TGGTATTACTGCTCAACAAGCT                      |
| Primer <i>OmpB</i> R | CAGTAAAGTCTATTGATCCTACACC                   |
| Probe <i>OmpB</i>    | FAM-CGCGATCGTTAATAGCAGCACCAGCATTATCGCG-BHQ1 |

### Note:

The Primer 47 F, Primer 47 R , Probe 47 was design to detecte *Orientia Tsutsugamushi*.

The Primer 17 F; Primer 17 R; Probe 17 was used to diagnose bacteria of genera *Rickettsia*

The Primer *OmpB* F; Primer *OmpB* R and Probe *OmpB* was use to diagnose *R.typhi*.

**Table S2. The component of real-time PCR reaction**

| <b>Components</b>           | <b>Volume (<math>\mu</math>l)/reaction</b> |
|-----------------------------|--------------------------------------------|
| DNA template                | 5.0                                        |
| Master Mix                  | 12.5                                       |
| 50mM MgCl <sub>2</sub>      | 1.0                                        |
| Forward primer (10 $\mu$ M) | 1.0                                        |
| Reverse primer (10 $\mu$ M) | 1.0                                        |
| Probe (10 $\mu$ M)          | 1.0                                        |
| Deionized Water             | 3.5                                        |
| <b>Total</b>                | <b>25.0</b>                                |

**Table S3. The cycle of real-time PCR reaction**

| <b>Stage</b>  | <b>Cycle</b> | <b>Steps</b> | <b>Temperature<br/>[<math>^{\circ}</math>C]</b> | <b>Thời gian<br/>[hh:mm:ss]</b> |
|---------------|--------------|--------------|-------------------------------------------------|---------------------------------|
| Denaturation  | 1            |              | 95                                              | 00:02:00                        |
| Amplification | 40           | Denaturation | 95                                              | 00:00:30                        |
|               |              | Annealing    | 60                                              | 00:00:30                        |

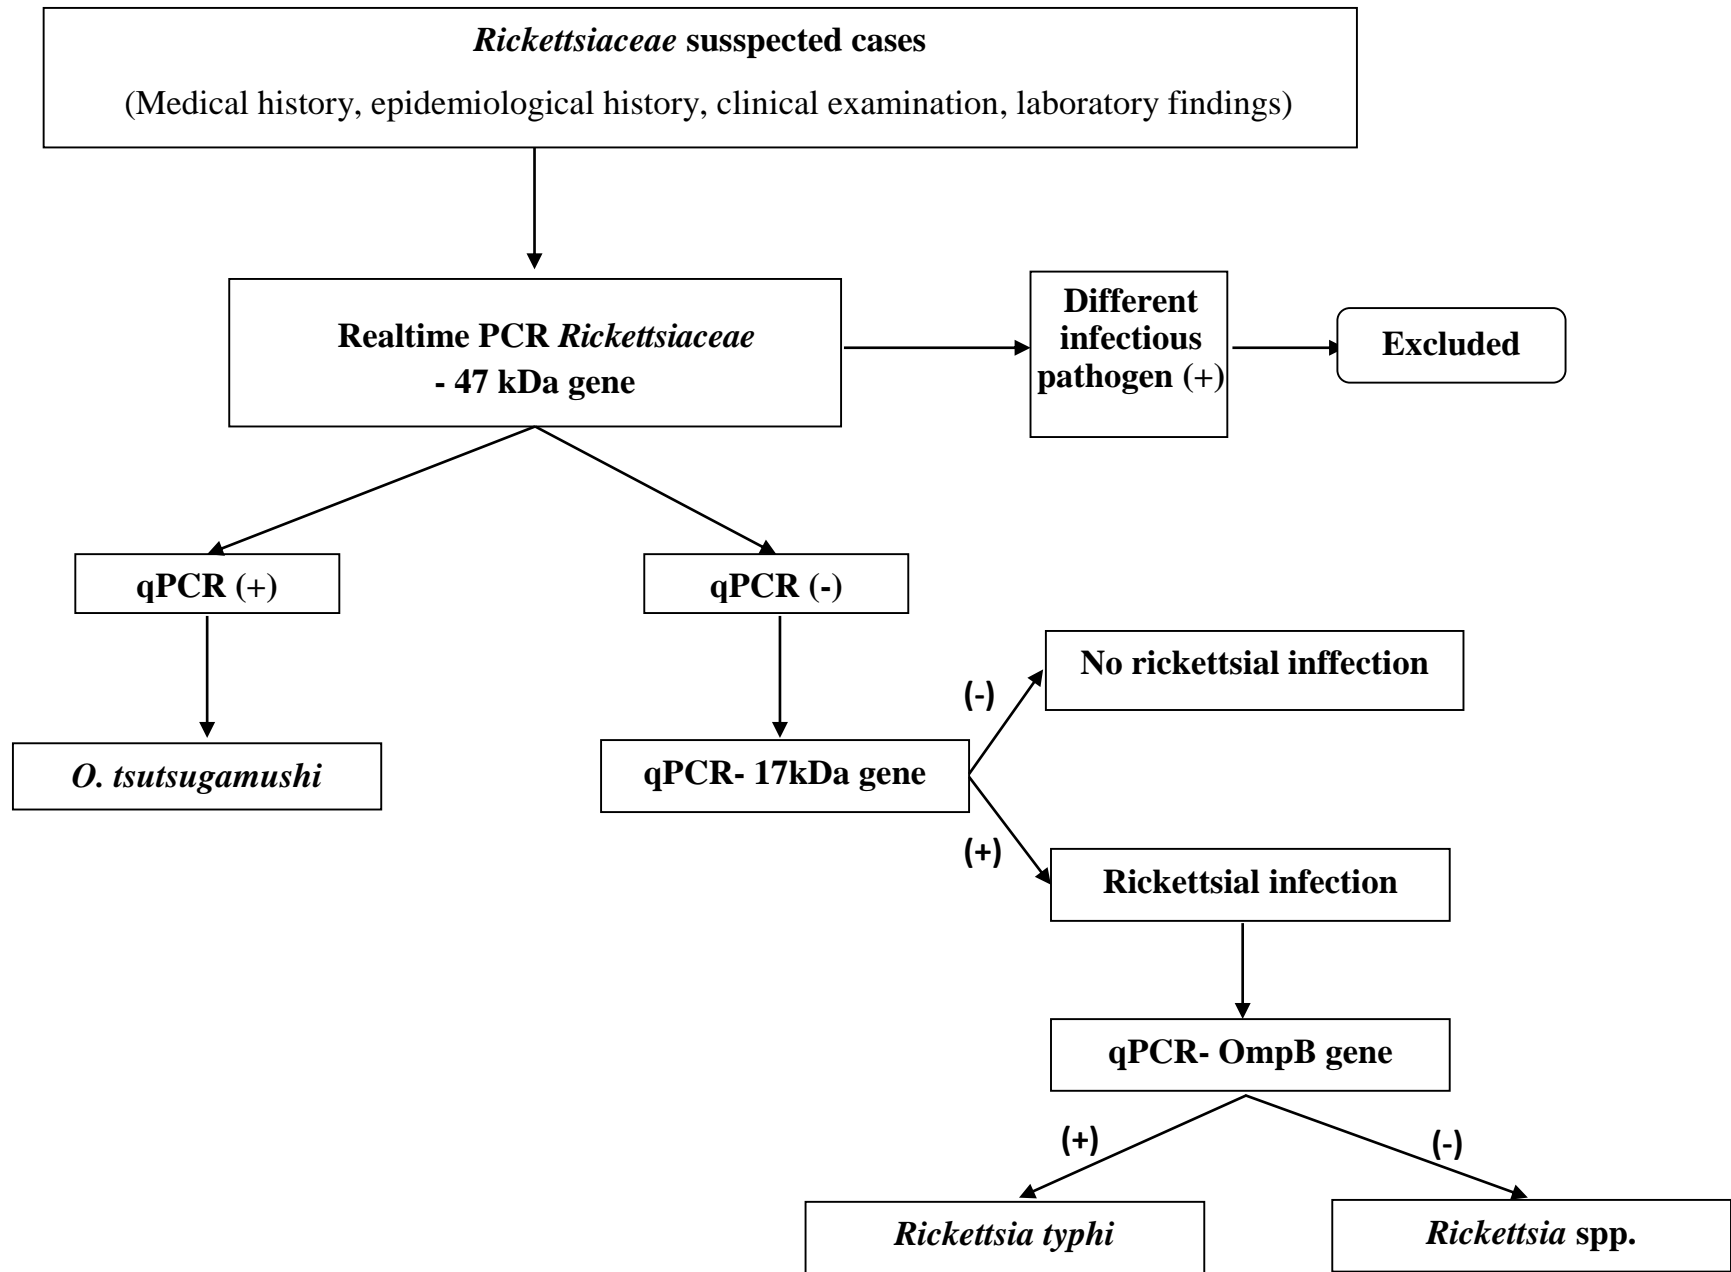

**Figure S1. The steps of diagnosis Rickettsiosis patients and differentiating the *Rickettsiaceae* species**

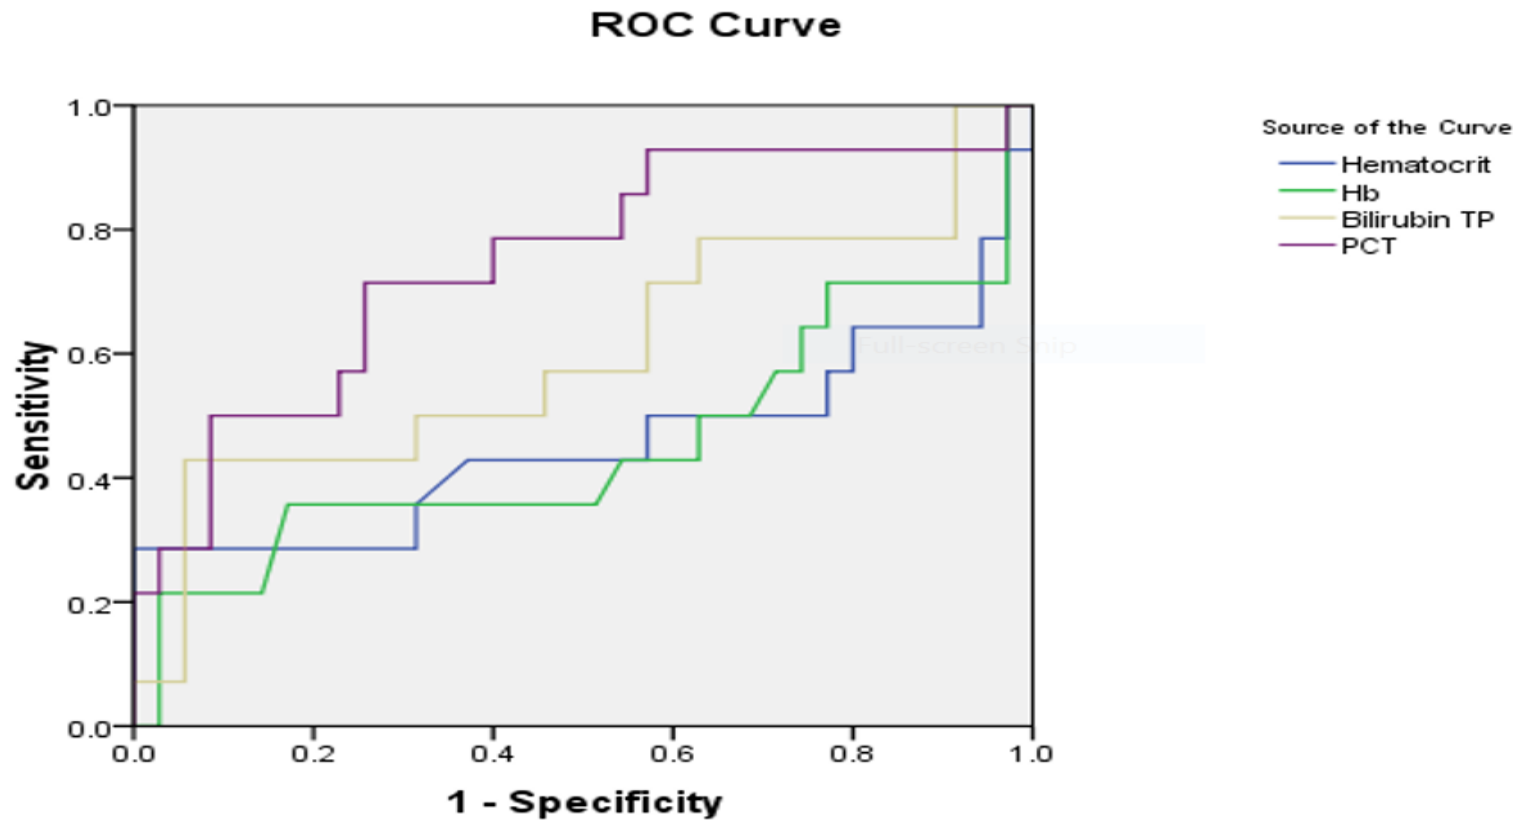

Diagonal segments are produced by ties.

**Figure S2. ROC analysis of some variables to predict severe complications in patients with rickettsial infection**

PCT level had fair power to differentiate between 2 group of patients with AUC = 0.75. The others variable had no usefulness to differentiate between 2 groups of patients. At PCT value > 4.4 ng/ml, the specificity of PCT to predict severe complication was 94.4% however the sensitivity at this point was only 37.5%.
